# Supplementary material for: Estimation of real-infection and immunity against SARS-CoV-2 in Indian populations
Source: bioRxiv or medRxiv preprint supplement (doi:10.1101/2021.02.05.21251118), 2021-02-08
Supplement: Supplementary file [file media-1.pdf]

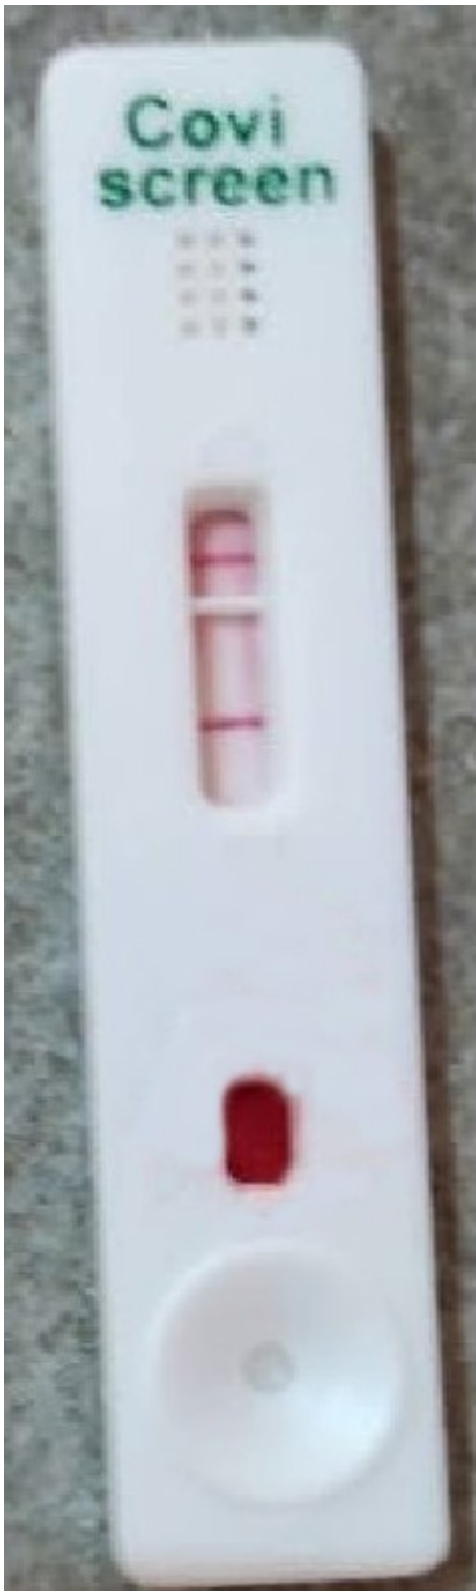

Positive

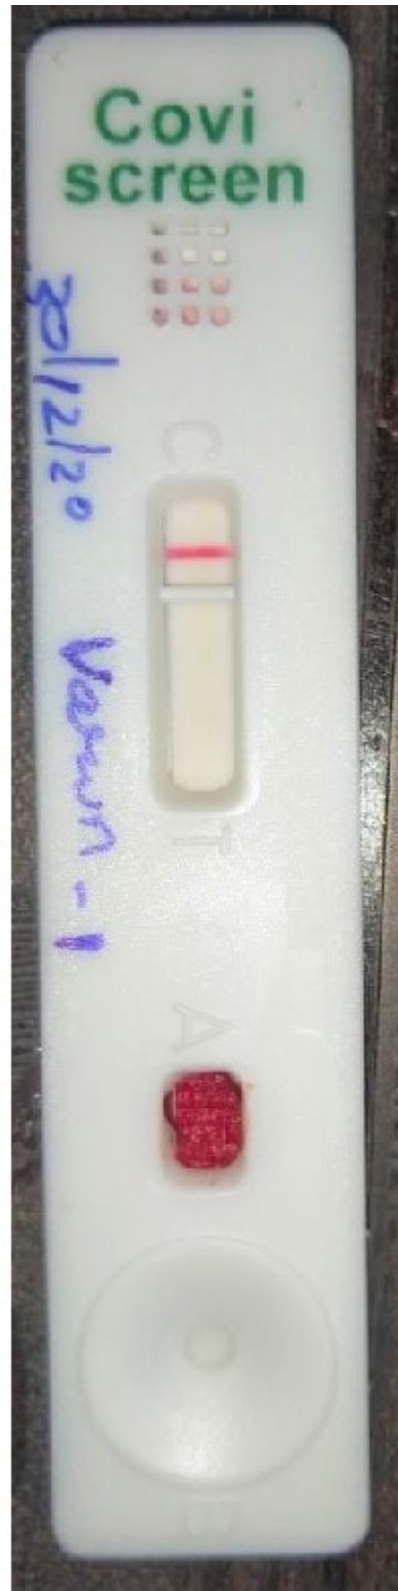

Negative
